# Supplementary material for: Optogenetic Rac1 engineered from membrane lipid-binding RGS-LOV for inducible lamellipodia formation
Source: Royal Society of Chemistry journal article supplement (doi:10.1039/c9pp00434c), 2020-02-05
Supplement: c9pp00434c2.pdf [file c9pp00434c2.pdf]

## Optogenetic Rac1 engineered from membrane lipid-binding RGS-LOV for inducible lamellipodia formation

Erin E. Berlew, Ivan A. Kuznetsov, Keisuke Yamada, Lukasz J. Bugaj, and Brian Y. Chow \*

Department of Bioengineering, University of Pennsylvania, 210 South 33<sup>rd</sup> Street, Philadelphia, PA 19104, United States; (\*) Correspondence: [bchow@seas.upenn.edu](mailto:bchow@seas.upenn.edu)

### SUPPLEMENTARY FIGURES

#### Domain annotations:

BcLOV4 (1-596)

RGS domain: 124-234

LOV domain: 256-356

Amphipathic helix: 404-417

DUF domain: 427-567

wild-type Rac1: 606-795

mCherry: 804-1039

Linkers: 597-604, 796-803

```
MATDAIDHYY QNRDGPPSR S FSDEYDSYNK TAPLPPLSAC PERAQTPN SK RIPITPNSAK 60
STSESPRRIT FSRDAGSSTK GSTQTSPSNQ GSVSSRNGSN GNGLGLSSAG NFADFFSSEV 120
FYIVLHNPTT AHRFLKFCQS RACSENLEFL QKIDEYNRLI DEATRLLSTI YSTYVSSSEAP 180
KQINISNSHA RRLSHDIKGA THNVLPGL ED IFNGSQEQIE KLLASDLYPR FVKHQVTASA 240
TMALANDKER YPGLGDCFC L TDPRRADNPI VFASDGFVSV TGYSRSDIIP RNCRFLQGSF 300
TDRQATKRLR TSIENREETV ELLLN YRKN G DPFWNLLYVS PLLDGN GDVR FFLGGQINCS 360
TTIHSRTDVL RILSLNDEDT GSFIEGSNKT PSVRSKESNN ASNYGKTSF KSFKKYKANT 420
VEIRDEAGME GELIDRIGKL QFKTQVEEFY TAYSKYLVL S YQPQSQNLIV KYFSPGIVDM 480
LNLNMPNGLV APIVDK DIFK VLTEHSPSSV PRTFKNVVRE GIKAGRAVSV ETGLLTGIEE 540
IKKSQNIFSG TTANRREGWK KAEKYVCHF TPCKDEMGRV GWVVLTVAPK LERFEFGGGS 600
GGGSMQAIKC VVVG DGA V GK T CLLISYTTN AFPGEIYPTV FDNYSANVMV DGKPVNLGLW 660
DTAGQEDYDR LRPLSY P QTD VFLICFSLVS PASFENVRAK WYPEVRHHC P NTP IILVGTK 720
LDLRDDKDTI EKLKEK K LTP ITYPQGLAMA KEIGAVKYLE CSALTQRGLK TVFDEAIRAV 780
LCPPPVKR K RKCLLGGGSG GGS MVSKGEE DNMAI KEFM RFKVHMEGSV NGHEFEIEGE 840
GEGRPYEGTQ TAKLKVTGGG PLPFAWDIL S PQFMYGSKAY VKHPADIPDY LKLSFPEGFK 900
WERVMNFEDG GVVTVTQDSS LQDGEFIYKV KLRGTNFPSP GPVMQKKTMG WEASSERMYP 960
EDGALKGEIK QRLKLDGGH YDAEVKTTYK AKKPVQLPGA YNVNIKLDIT SHNEDYTIVE 1020
QYERAEGRHS TGMDELYK 1039
```

Supplementary Figure 1. Opto-Rac1 protein sequence.

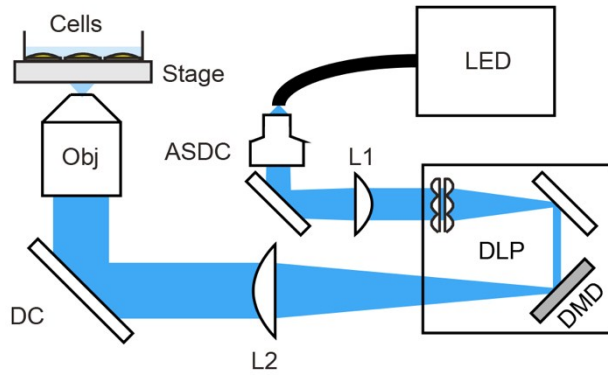

**Supplementary Figure 2. Structured illumination schematic.** Light from a liquid light guide-coupled  $\lambda = 455$  nm LED was collimated into the (DMD) digital micromirror device-based DLP (digital light processor, Digital Light Innovations CEL5500) via an air-spaced doublet collimator (ASDC, Thorlabs F810APC-405) and a plano-convex lens (L1,  $f = 200$  mm). After the DLP the projected illumination pattern was infinity-corrected using another plano-convex lens (L2,  $f = 150$  mm). The light was then redirected to the objective (Obj, 63x / 1.40 NA, Leica #506187) using a shortpass dichroic (DC,  $\lambda < 900$  nm, Thorlabs DMLP900R) mounted in a custom K type laser cube (Nuhsbaum). The LED was from Mightex (LCS-0455-3-22).

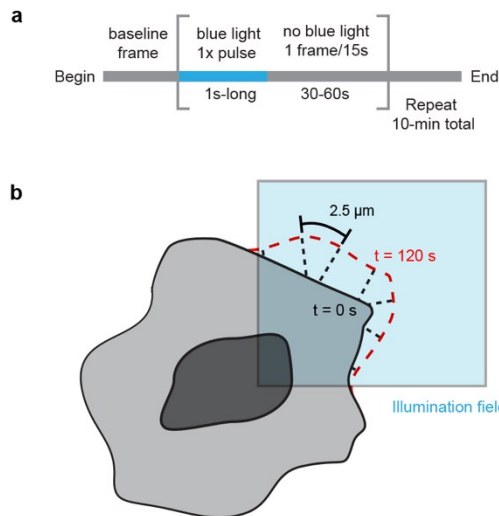

**Supplementary Figure 3: Summary of optogenetic assays and analysis.** (a) Stimulation epochs using a digital micromirror device to spatially pattern illumination fields. (b) Analysis methodology to determine distance moved by cell. The cell border was manually segmented at 0 seconds post-illumination (black solid border) and at 120 seconds post-illumination (red dashed line). The distance moved by the cell was defined as the mean length of line segments (black dashed line) that were normal to the cell border at 120 seconds, with one endpoint at the  $t = 0$  border and the other endpoint at the  $t = 120$  s border. Line segments were spaced at  $2.5 \mu\text{m}$  intervals along the  $t = 120$  s border.

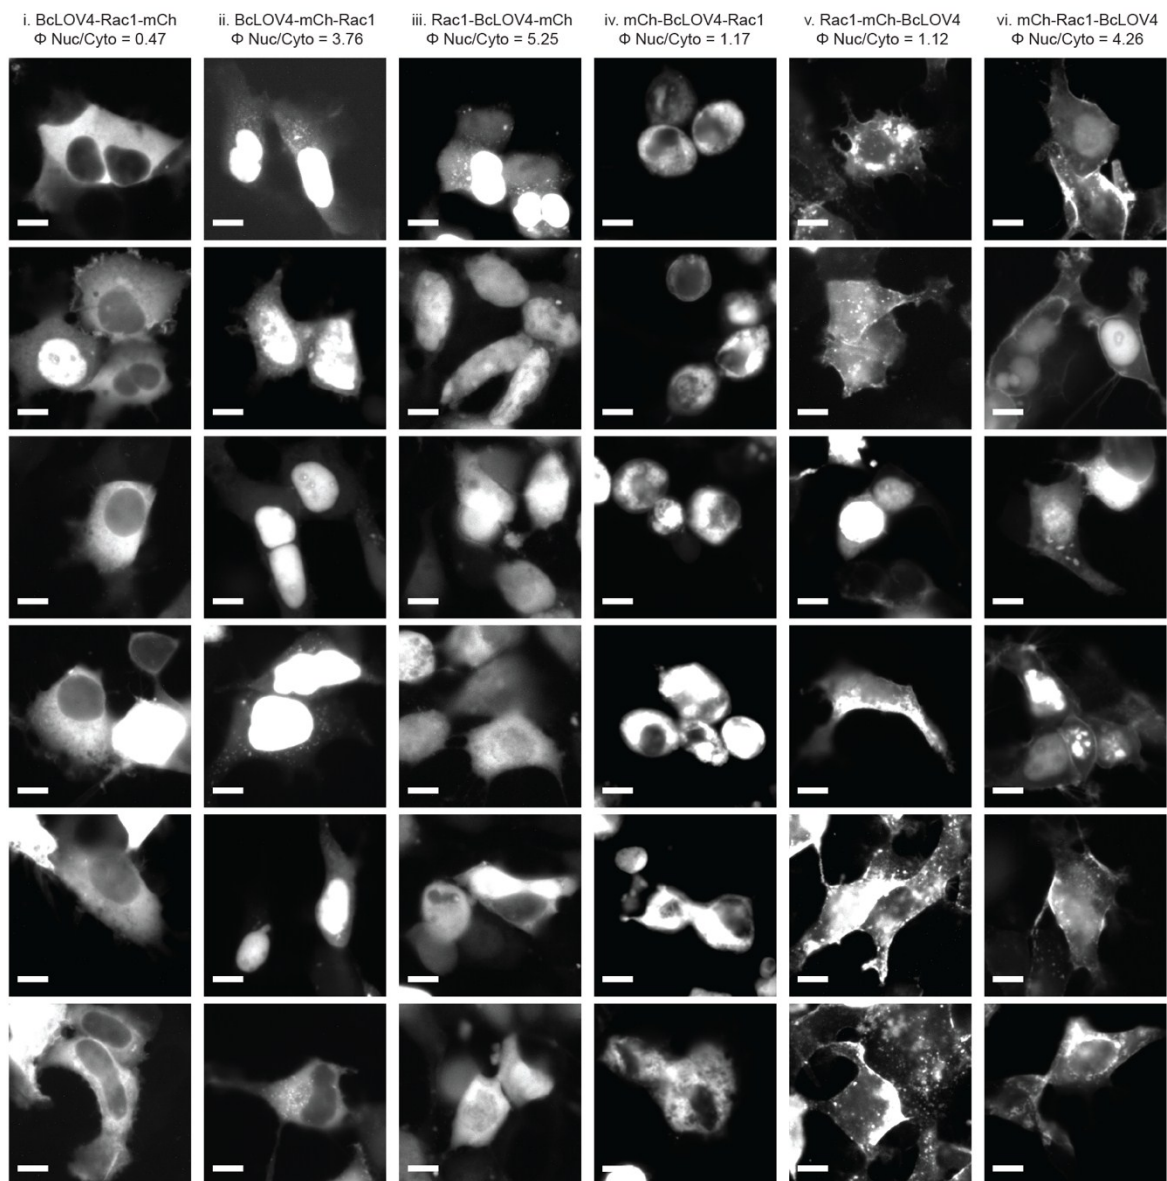

**Supplementary Figure 4. Representative distribution of expression profile in HEK cells of domain arrangements screened in engineering opto-Rac1.** Fluorescence micrographs of transfected HEK cells in the dark-adapted state. ( $\phi$  Nuc/Cyto) = ratio of observed average fluorescence intensity in the nucleus vs. cytoplasm (N = 25 – 35 each). The dominant preference for nuclear localization of genetic constructs ii. and iii., plus their lack of plasma membrane localization, indicates that their nuclear localization is not a consequence of cell cycle phase or sequestration by the plasma membrane. Scale = 10  $\mu$ m.

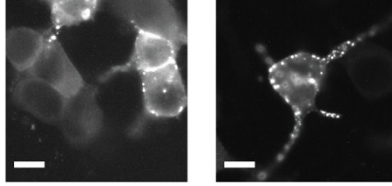

**Supplementary Figure 5.** Fluorescence micrographs of mKoKappa-BcLOV4 expressed in HEK cells. The BcLOV4 fusion with mKoKappa as a signaling inert N-terminal protein is aggregated and membrane localized in the dark-adapted state, consistent with opto-Rac1 domain arrangements screened with C-terminal BcLOV4. Scale = 10  $\mu$ m.

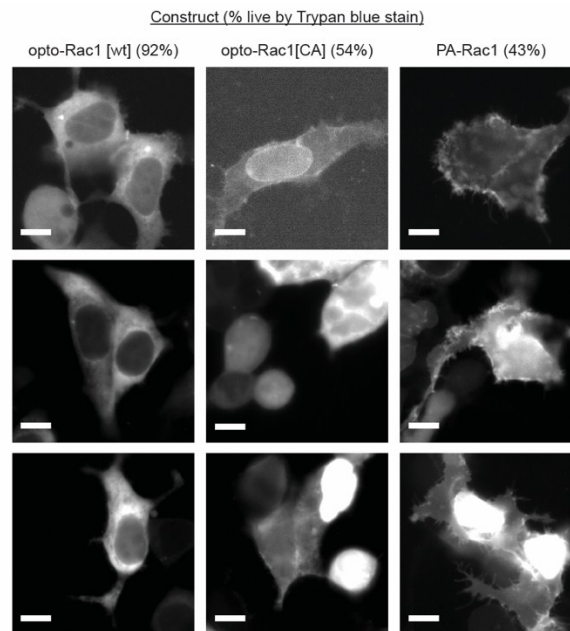

**Supplementary Figure 6: Expression of constitutively active Rac1 constructs in HEK cells.** Multiple representative cells were imaged in the dark-adapted state. Constitutively active [CA] Rac1 fused to BcLOV4 reduced cell health based on Trypan Blue live/dead cell count, and compromised morphology with evidence of spurious activity in the dark-adapted state. The top-center image, chosen to demonstrate permanent membrane localization in non-rounded cells, shows high background after auto-contrast because of dimmer raw fluorescence. For reference, photoactivatable Rac1 (PA-Rac1), a fusion of AsLOV2 and constitutively active Rac1, shows spurious sheet-like protrusions in the dark-adapted state under similar laboratory conditions. Scale bar = 10  $\mu$ m.

[For Video File]

**Supplementary Video 1.** Focal induction of lamellipodia formation in opto-Rac1 transducing cells in response to spatially patterned illumination. Field of view = 60 x 60  $\mu$ m. Box = Illumination field.  $\lambda$  = 455 nm @ 15 mW/cm<sup>2</sup>, 1.6% duty ratio.
